# Supplementary material for: Polymerization of α-(halomethyl)acrylates through sequential nucleophilic attack of dithiols using a combination of addition–elimination and click reactions
Source: Royal Society of Chemistry journal article supplement (doi:10.1039/c6py02145j), 2016-12-27
Supplement: c6py02145j1.pdf [file c6py02145j1.pdf]

# Polymerization of $\alpha$ -(Holomethyl)acrylate through Sequential Nucleophilic Attacks of Dithiols by the Combination of Addition-Elimination and Click Reactions

Yasuhiro Kohsaka<sup>\*</sup>, Keito Hagiwara and Kei-ichiro Ito

Faculty of Textile Science and Engineering, Shinshu University, 3-15-1 Tokida, Ueda, Nagano 386-8567, Japan

E-mail: kohsaka@shinshu-u.ac.jp; Tel: +81-246-21-5488

---

## Electric Supplementary Information

### *Cyclization reaction as a side reaction of polymerization*

Cyclization reaction was found as a side reaction in the polymerization of **A1** (0.750 mmol) and **C1** (1.00 equiv.). The polymerization was conducted in CH<sub>3</sub>CN (0.50 mL) with DBU (1.20 equiv.) for 24 h under reflux (Run 5). Figure S1 shows the SEC curves of the resulting product. Apparently, it has a tail towards the lower molecular weight region, and the estimated  $M_n$  and  $M_w/M_n$  were 200 and 17.1, respectively. The <sup>1</sup>H NMR spectrum of the product (Figure S2) shows signals assignable to the end group (**a**, **b**, and **o**). From the intensity ratio of O-CH<sub>2</sub> signals to them, the  $M_n$  could be estimated 12000, which was much higher than that estimated by SEC. The overestimation can be explained by the formation of cyclic products, which decrease the intensity of end-group NMR signals as well as polymerization. The cyclized products also give the explanation to the broad  $M_w/M_n$  and the tailing of SEC curve.

Similar experiment was employed with **C2** instead of **C1** (Run S1). In this case, the SEC curve shows a broad peak in the polymeric region accompanying several sharp peaks at the oligomeric region ( $MW < 10^3$ ) (Figure S3). In the <sup>1</sup>H NMR spectrum shows complete disappearance of end group signals (Figure S4). Therefore, it can be concluded that cyclization occurred, probably due to the more flexible oligo(ethylene glycol) linker of **C2** than alkyl linker of **C1**.

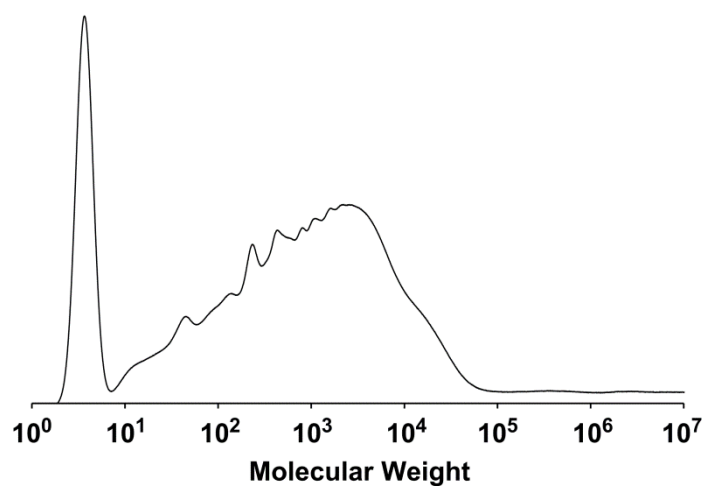

**Figure S1.** SEC curve of the product in Run 5 (THF, 40 °C, PS standards).

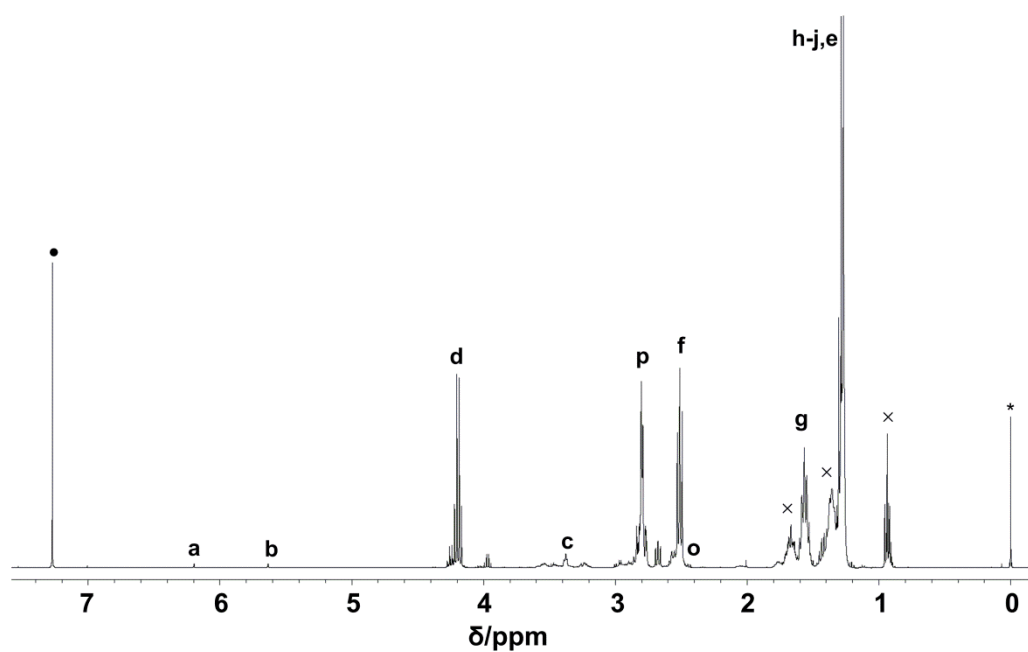

**Figure S2.**  $^1\text{H}$  NMR spectrum of the product in Run 5 (400 MHz,  $\text{CDCl}_3$ , 30 °C). ●:  $\text{CHCl}_3$ , \*: tetramethylsilane and x:  $\text{Bu}_3\text{P}$ . The other labels correspond to those in Scheme 2.

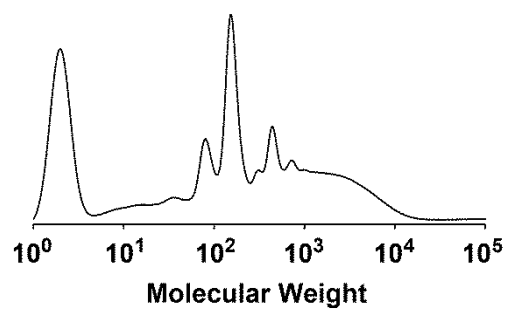

**Figure S3.** SEC curve of the product in Run S1 (THF, 40 °C, PS standards).

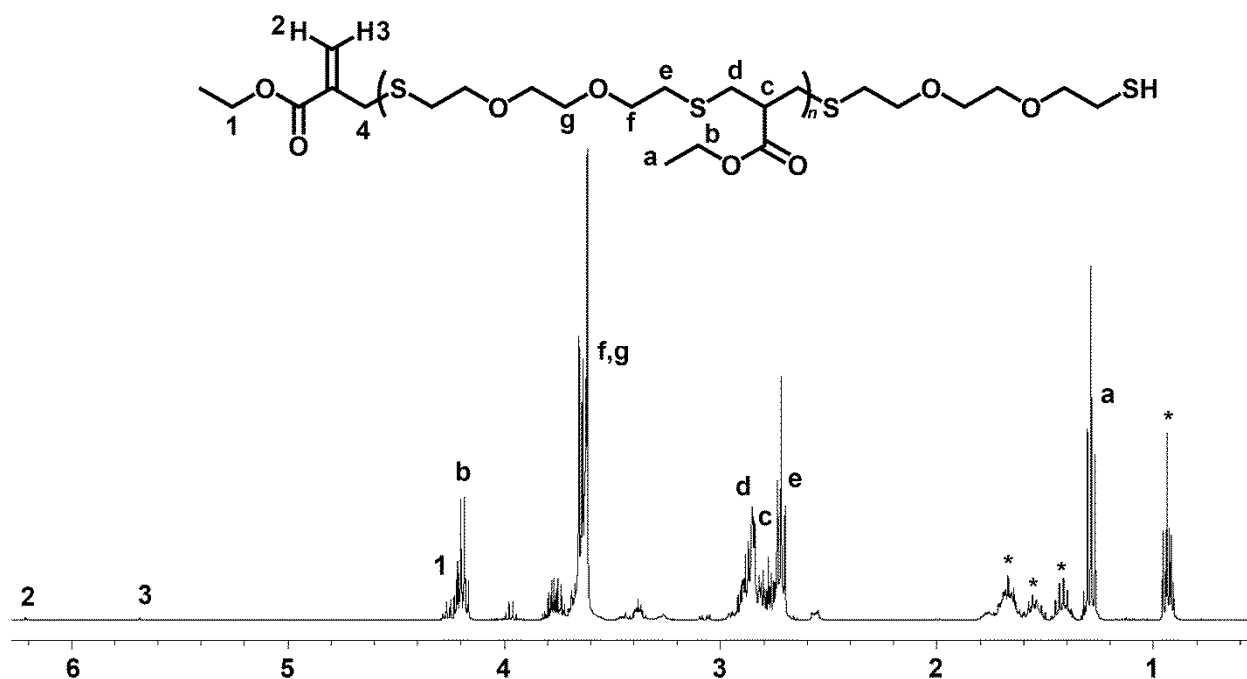

**Figure S4.**  $^1\text{H}$  NMR spectrum of the product in Run S1 (400 MHz,  $\text{CDCl}_3$ , 30  $^\circ\text{C}$ ). \*:  $\text{Bu}_3\text{P}$ .

#### **Effects of heating process on the cyclization and polymerization**

In the all examples described in the main manuscript (Runs 1-11), **A1** was added to a mixture of **C1** and base at the set temperatures, and  $\text{Bu}_3\text{P}$  was added after 30 min. Consequently, the second reaction, *i.e.* the Michael addition started at the set temperatures. In order to know the effect of heating process on the cyclization and polymerization, the reaction mixture was prepared at 20  $^\circ\text{C}$  in a similar manner to Run 9 and stirred for 48 h, and the reaction mixture was heated at 80  $^\circ\text{C}$  for more 24 h (Run S2). Similar experiment was employed, where the initial temperature was changed to 50  $^\circ\text{C}$  (Run S3). In both case, the growth of  $M_n$  was monitored with SEC. Figure S5 shows the time vs.  $M_n$  plots in each experiment. After the elevation of temperature,  $M_n$ s were changed from 23000 to 26300 in Run S2 and from 14700 to 14200 in Run S3, respectively. In a sharp contrast to Run 10,  $M_n$ s were kept higher even under reflux conditions, and therefore, the cyclization seems to arise in the early stage of polymerization.

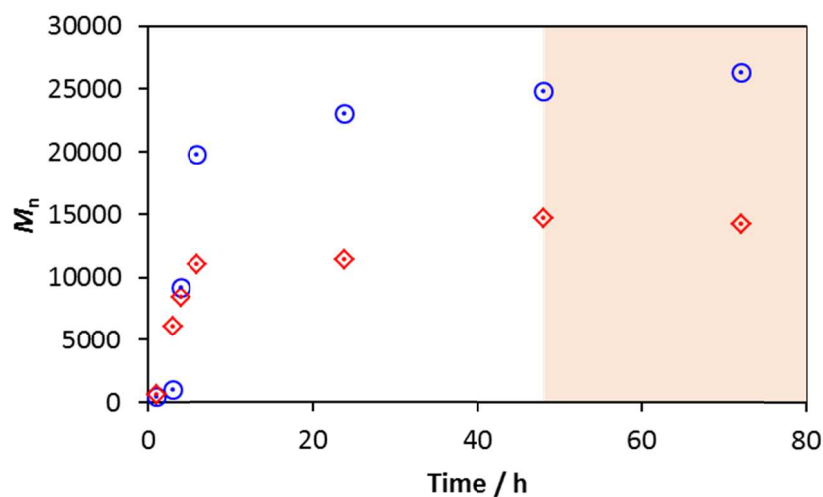

**Figure S5.** Plots of time vs.  $M_n$  in Runs S2 (blue circles) and S3 (red diamonds) determined by SEC (THF, 40  $^\circ\text{C}$ , PS standards). The orange highlighted area means after increasing temperature to 80  $^\circ\text{C}$ .
